# Supplementary material for: RETRACTED ARTICLE: Mir20a/106a-WTX axis regulates RhoGDIa/CDC42 signaling and colon cancer progression
Source: PubMed Central journal article supplement (PMC6328557; doi:10.1038/s41467-018-07998-x), 2019-01-10
Supplement: 41467_2018_7998_MOESM1_ESM.pdf [file 41467_2018_7998_MOESM1_ESM.pdf]

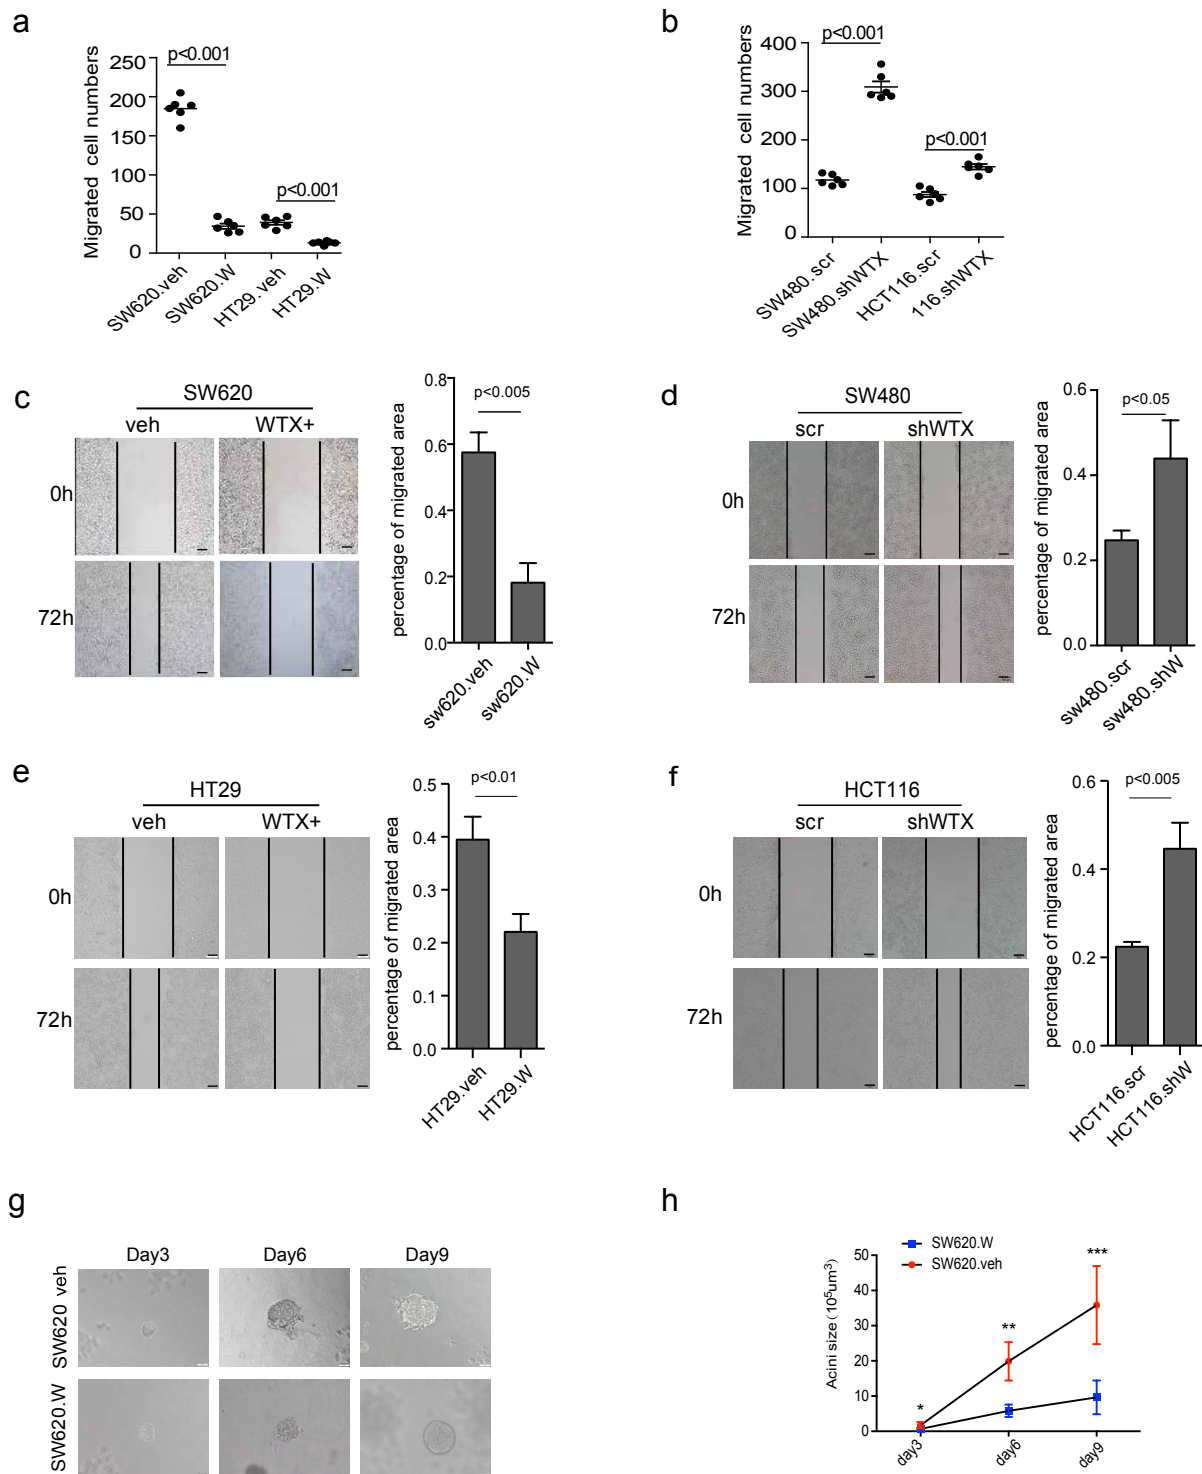

**Supplementary Figure 1. WTX inhibits in vitro cell migration and tumor proliferation.**

**a-b**, Quantification of migrated cells in the indicated cell lines. The migrated cell numbers are counted from three independent experiments respectively. **c-f**, Wound healing assay analyzes the indicated cells.

Scale bars, 100  $\mu\text{m}$ . **g-h**, 3D tumor growth observation (**g**) and growth curve (**h**) of the control and SW620.W cells. Scale bars, 50  $\mu\text{m}$ . \*\*\* $p < 0.001$ , \*\* $p < 0.01$ , \* $p < 0.05$ . Mean  $\pm$  SEM, Two-tailed Student's t-test, 3 biological replicates, with 3 technical replicates each.

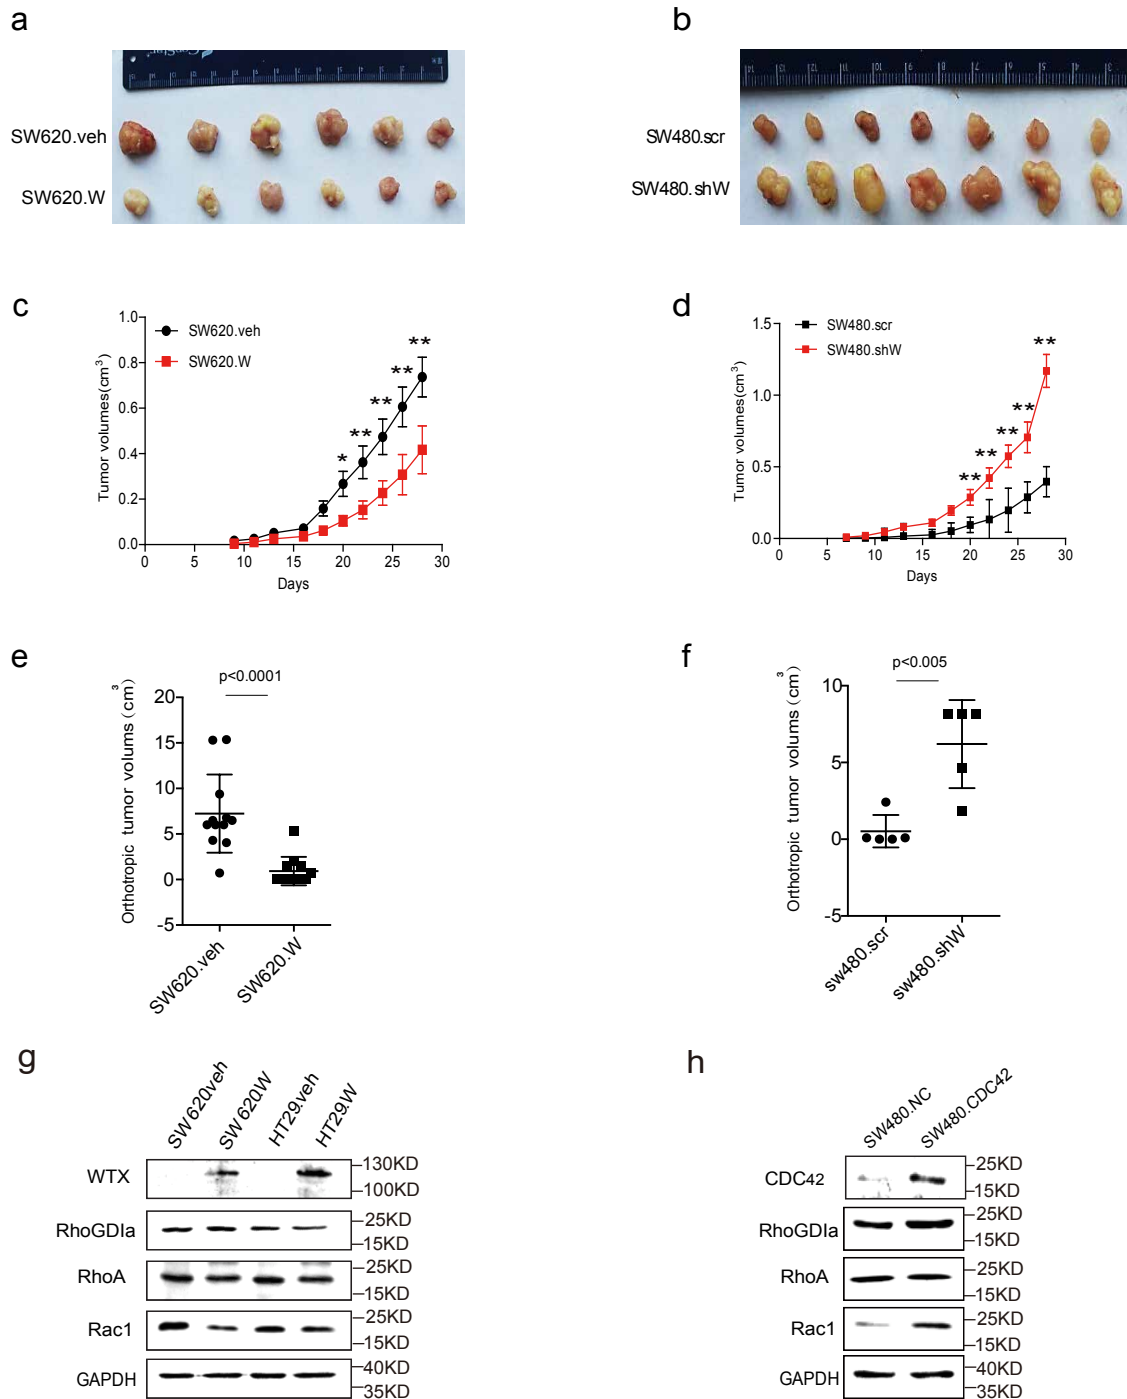

**Supplementary Figure 2. WTX inhibits *in vivo* tumor proliferation.**

**a-b**, Gross observation of the subcutaneous xenograft tumors of the indicated cell lines. Error bars represent mean  $\pm$  SEM. Two-sided unpaired t-test. **c-d**, The tumor growth curves of the indicated subcutaneous xenograft tumors. \*\*\* $p < 0.001$ , \*\* $p < 0.01$ , \* $p < 0.05$ , mean  $\pm$  SEM, Two-tailed Student's t-test, 3 biological replicates, with 3 technical replicates each. **e-f**, Tumor volumes quantify to the control and indicated CRC orthotopic tumors, match to Figure 1n~1o. \*\*\* $p < 0.0001$ , mean  $\pm$  SEM, Two-tailed Student's t-test. **g**, IB analysis of WTX, RhoGDIa, RhoA, and Rac1 expression in indicated WTX overexpression and control cell lines. **h**, IB analysis of CDC42, RhoGDIa, RhoA, and Rac1 expression in indicated CDC42 overexpression and control cell lines.

a

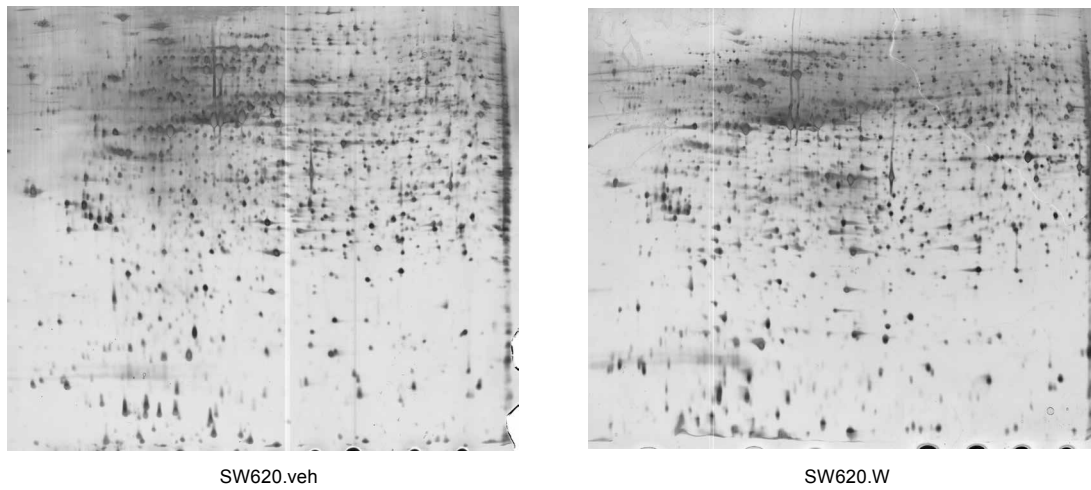

b

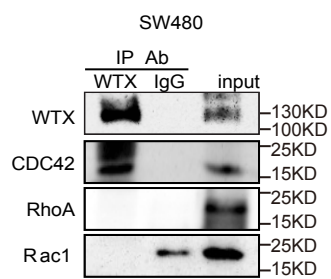

c

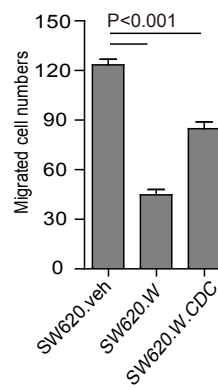

d

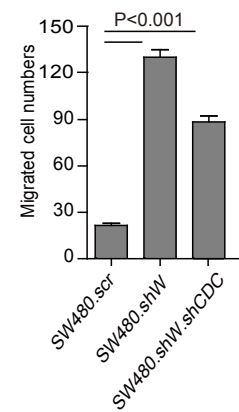

e

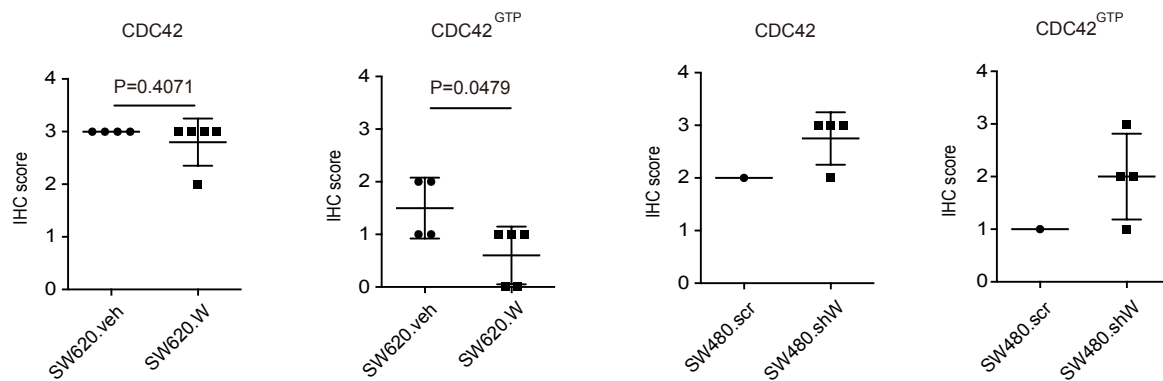

**Supplementary Figure 3. WTX downstream proteins screen and CDC42 activity analysis.**

a, 2-DGE analyzes the protein patterns of SW620.veh and SW620.W cell lines. b, CO-IP analyzes the interaction of WTX and Small GTPases family members. c-d, Quantification of transwell experiments of indicated cells. \*\* $p < 0.001$ , mean  $\pm$  SEM, Two-tailed Student's t-test, 3 biological replicates, with 3 technical replicates each. Two-sided unpaired t-test. e, Statistic analysis of IHC staining scores of CDC42 and CDC42<sup>GTP</sup> expression in CRC orthotopic tumors. \* $p < 0.05$ , mean  $\pm$  SEM, Two-tailed Student's t-test.

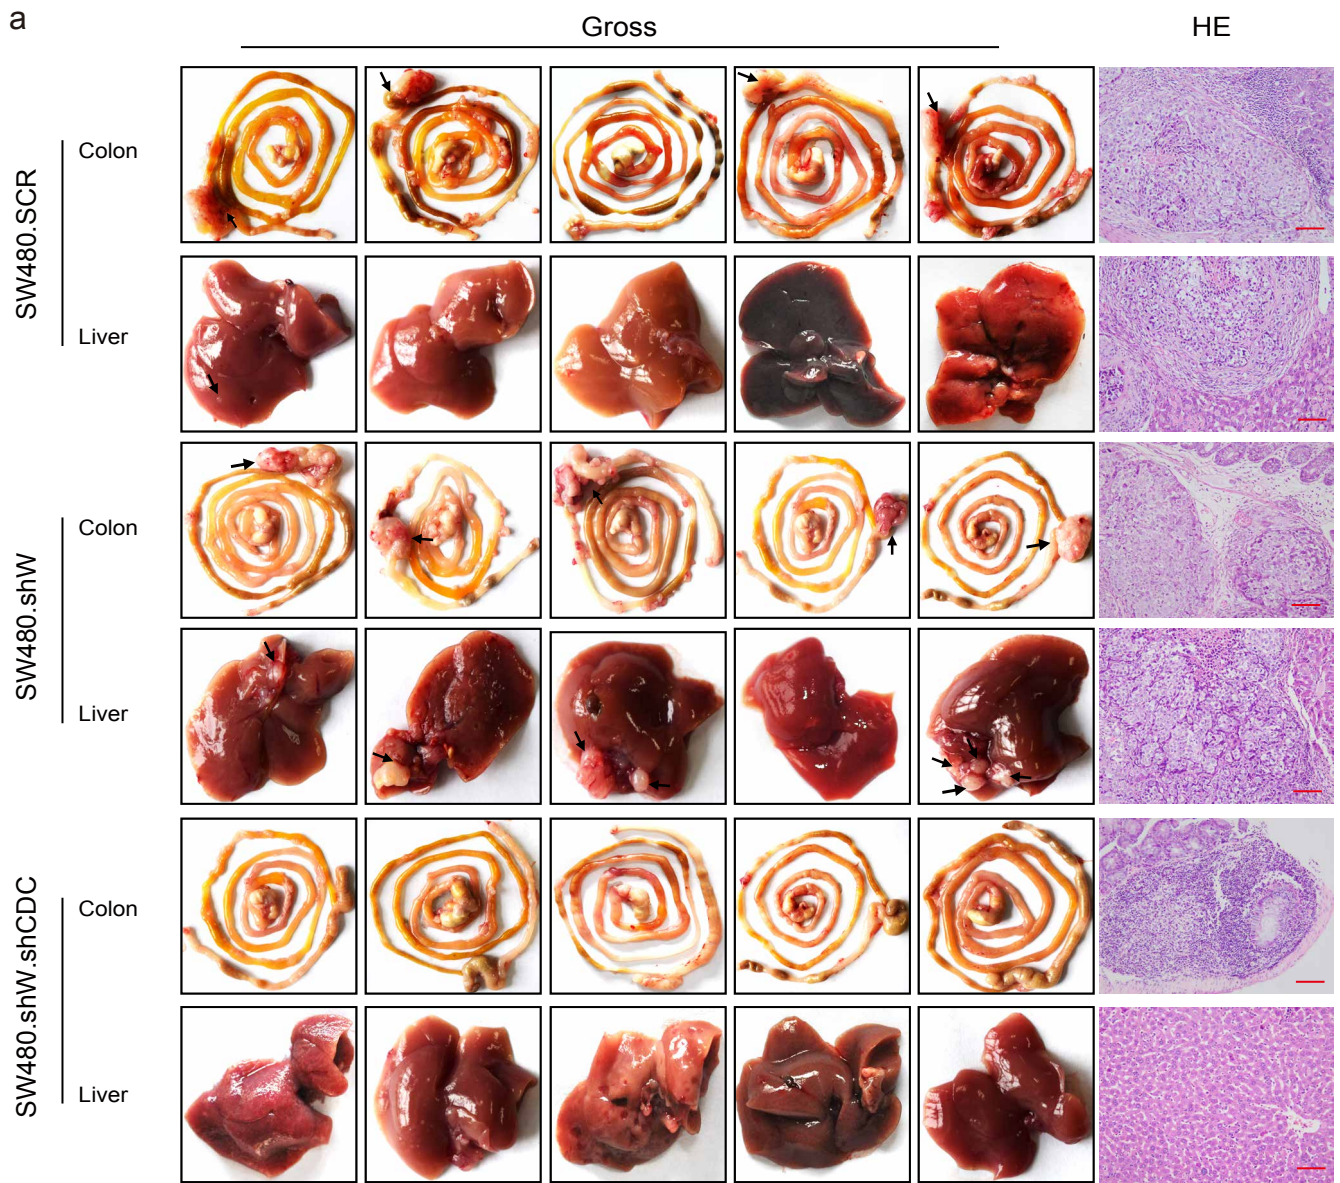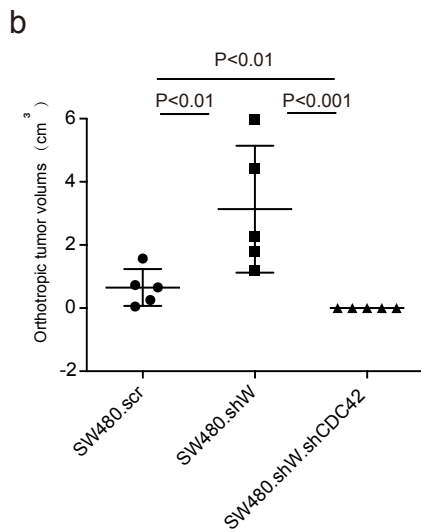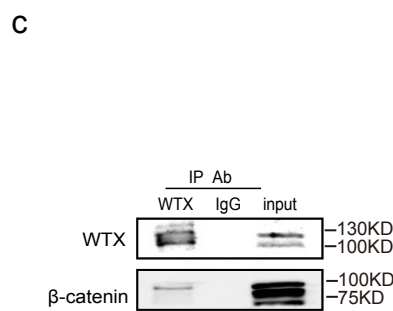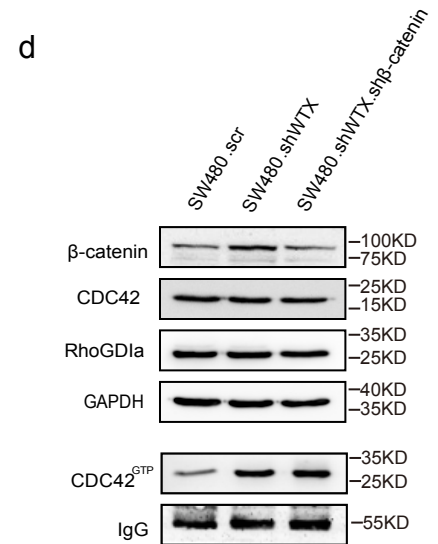

**Supplementary Figure 4. Establishing orthotopic xenograft CRC models to verify the effect of CDC42 in WTX regulated pathway.**

**a**, The gross and HE of orthotopic xenograft CRC models of SW480.NC, SW480.shW and SW480.shW.shCDC.  
**b**, Statistical analysis of orthotopic xenograft CRC models of SW480.NC, SW480.shW and SW480.shW.shCDC.  
 \* $p < 0.05$ , mean  $\pm$  SEM,  $n = 5$ , Two-tailed Student's t-test. **c**, CO-IP analyzes WTX binding with  $\beta$ -catenin in indicated cells.  
**d**, IB analyzes CDC42, CDC42<sup>GTP</sup>, and RhoGDIa expression changings in comparing WTX knockdown, WTX and  $\beta$ -catenin double- knockdown cells.



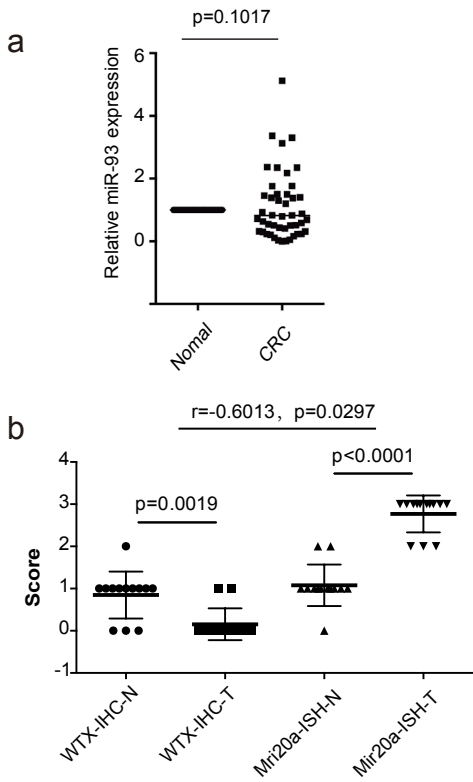

**f**

Sequence ID: lcl|47395 Length: 4761 Number of Matches: 1

Range 1: 1926 to 2516 [Graphics](#)

| Score          | Expect                                                        | Identities    | Gaps      | Strand     |
|----------------|---------------------------------------------------------------|---------------|-----------|------------|
| 1092 bits(591) | 0.0                                                           | 591/591(100%) | 0/591(0%) | Plus/Minus |
| Query 267      | CAAGGCTGTCCAAACCATGAACCTCTCACTCAGCCCCAGGCCCTACTCTGTGGTGTGTGAC | 326           |           |            |
| Sbjct 2516     | CAAGGCTGTCCAAACCATGAACCTCTCACTCAGCCCCAGGCCCTACTCTGTGGTGTGTGAC | 2457          |           |            |
| Query 327      | CTTCCAAAGCCCAACAAAGTGTGTGAGGGCTATGCCAGTCCCTCCAGAGACAATGCCTC   | 386           |           |            |
| Sbjct 2456     | CTTCCAAAGCCCAACAAAGTGTGTGAGGGCTATGCCAGTCCCTCCAGAGACAATGCCTC   | 2397          |           |            |
| Query 387      | ATGCTGCCTTCTGTATCTGAGGGCAGCTCTCAGCCCTTAGCCAAAGTTGGCCACCTCC    | 446           |           |            |
| Sbjct 2396     | ATGCTGCCTTCTGTATCTGAGGGCAGCTCTCAGCCCTTAGCCAAAGTTGGCCACCTCC    | 2337          |           |            |
| Query 447      | TTTTTCTCTCCAGATAGGCTGGTGGCCCTTCTCCAGCAGGGTCTGGAGGCTGGTGAIG    | 506           |           |            |
| Sbjct 2336     | TTTTTCTCTCCAGATAGGCTGGTGGCCCTTCTCCAGCAGGGTCTGGAGGCTGGTGAIG    | 2277          |           |            |
| Query 507      | GCTCACCCTGCTGTGGCTGGCACAGTCCACATGTAGCAGAGCTCAAGTGCCTG         | 566           |           |            |
| Sbjct 2276     | GCTCACCCTGCTGTGGCTGGCACAGTCCACATGTAGCAGAGCTCAAGTGCCTG         | 2217          |           |            |
| Query 567      | AAAGAAGAGGCAAGAGGTGGTCTTCCCTGTTGTAAGGCATTGGTGAAGTTTACTT       | 626           |           |            |
| Sbjct 2216     | AAAGAAGAGGCAAGAGGTGGTCTTCCCTGTTGTAAGGCATTGGTGAAGTTTACTT       | 2157          |           |            |
| Query 627      | CTGCCAAATAGCCAGCCCAATTTCCAGCCCAACATCCAGAGCAGCTTTGGTAAGAGGC    | 686           |           |            |
| Sbjct 2156     | CCTGCCAAATAGCCAGCCCAATTTCCAGCCCAACATCCAGAGCAGCTTTGGTAAGAGGC   | 2097          |           |            |
| Query 687      | CAGAAAGTTGGAATTTGGGCACITCTCTCTTGGAAATGCTGTGGTGGGTAAAGAGGCC    | 746           |           |            |
| Sbjct 2096     | CAGAAAGTTGGAATTTGGGCACITCTCTCTTGGAAATGCTGTGGTGGGTAAAGAGGCC    | 2037          |           |            |
| Query 747      | TTCCTCACCTCTTTCAITCTCCAGCTCCACAACAGATACATTCTTCAAAATGTATCTG    | 806           |           |            |
| Sbjct 2036     | TTCCTCACCTCTTTCAITCTCCAGCTCCACAACAGATACATTCTTCAAAATGTATCTG    | 1977          |           |            |
| Query 807      | TAGCCAAAGTCAGCTGAAGAGCTGGTCTGGTCCCTTGGTGGTGGTGGT              | 857           |           |            |
| Sbjct 1976     | TAGCCAAAGTCAGCTGAAGAGCTGGTCTGGTCCCTTGGTGGTGGTGGT              | 1926          |           |            |

The blast of WTX-3'UTR sequencing of pGL3-control-WTX-3'UTR plasmid with WTX gene .

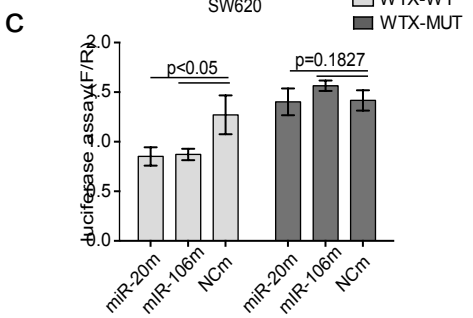

**g**

>lcl|64649 Length=929

Score = 1633 bits (894), Expect = 0.0  
Identities = 893/897 (99%), Gaps = 1/897 (0%)  
Strand=Plus/Plus

|           |                                                               |     |
|-----------|---------------------------------------------------------------|-----|
| Query 4   | GGCATCGGTCGACGGATCCCTTATCGATTTTACCACATTTGTAGAGGTTTTACTTGCCTTA | 63  |
| Sbjct 1   | GGCATCGGTCGACGGATCCCTTATCGATTTTACCACATTTGTAGAGGTTTTACTTGCCTTA | 60  |
| Query 64  | AAAAACCTCCACACCTCCCCCTGAACCTGAAACATAAAATGAATGCAATTGTTGTTGTT   | 123 |
| Sbjct 61  | AAAAACCTCCACACCTCCCCCTGAACCTGAAACATAAAATGAATGCAATTGTTGTTGTT   | 120 |
| Query 124 | AACCTGTTTATTCGACGCTTATATGTTTACAAATAAGCAATAGCATCAAAATTCACA     | 183 |
| Sbjct 121 | AACCTGTTTATTCGACGCTTATATGTTTACAAATAAGCAATAGCATCAAAATTCACA     | 180 |
| Query 184 | AATAAAGCATTCTTCTTCTGCACTTCTAGTTTGTGGTTTGTCCAAACTCATCAATGTATCT | 243 |
| Sbjct 181 | AATAAAGCATTCTTCTTCTGCACTTCTAGTTTGTGGTTTGTCCAAACTCATCAATGTATCT | 240 |
| Query 244 | TATCATGTCTGCTCGAAGCGGCCGCAAGGCTGTCCAAACCATGAACCTCTCACTCAGCC   | 303 |
| Sbjct 241 | TATCATGTCTGCTCGAAGCGGCCGCAAGGCTGTCCAAACCATGAACCTCTCACTCAGCC   | 300 |
| Query 304 | CCAGGCCCTACTCTGTGGTGTGTGACCTTCCAAAGCCCAACAGCC-TGTGTCAAGGCTATG | 362 |
| Sbjct 301 | CCAGGCCCTACTCTGTGGTGTGTGACCTTCCAAAGCCCAACAAAGTGTGTCAAGGCTATG  | 360 |
| Query 363 | CCAGTCCCTCAGAGACAATGCCTCATGCTGCCTTCTGATCTGAGGGCAGCTCTCAG      | 422 |
| Sbjct 361 | CCAGTCCCTCAGAGACAATGCCTCATGCTGCCTTCTGATCTGAGGGCAGCTCTCAG      | 420 |

The blast of WTX-3'UTR-Mut sequencing of pGL3-mutant-WTX-3'UTR plasmid with WTX gene .

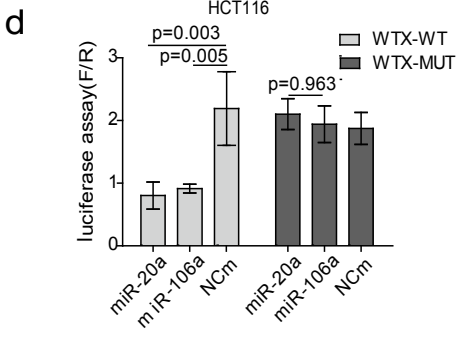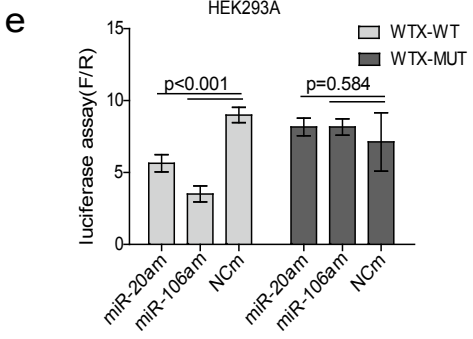

**h**

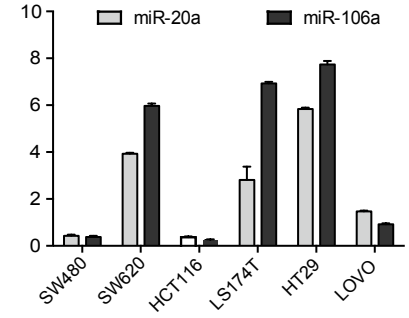

**Supplementary Figure 5. Screening out miRNAs which regulated WTX expression in CRC.**

**a**, The qRT-PCR analyzes miR-93 expression in colorectal cancer and adjacent normal colorectal mucosa tissues.  $p=0.1017$ . **b**, Statistics analyzes the correlations of the expressions of miR-20a and WTX.  $**p<0.01$ ,  $n=13$ . **c-e**, Luciferase activity assay verify the binding of miR-20a/106a with WTX 3'-UTR in SW620( $*p<0.05$ ), CT116( $**p<0.01$ ), and HEK293A( $***p<0.001$ ) cells. **f**, Sequence alignment of pGL3-control-WTX-3'UTR plasmid luciferase vector. **g**, Sequence alignment of pGL3-mutant-WTX-3'UTR plasmid luciferase vector. **h**, The qRT-PCR analyzes miRNA-20a/106a expression level in CRC cell lines. Mean $\pm$ SEM, Two-tailed Student's t-test, 3 biological replicates, with 3 technical replicates each.

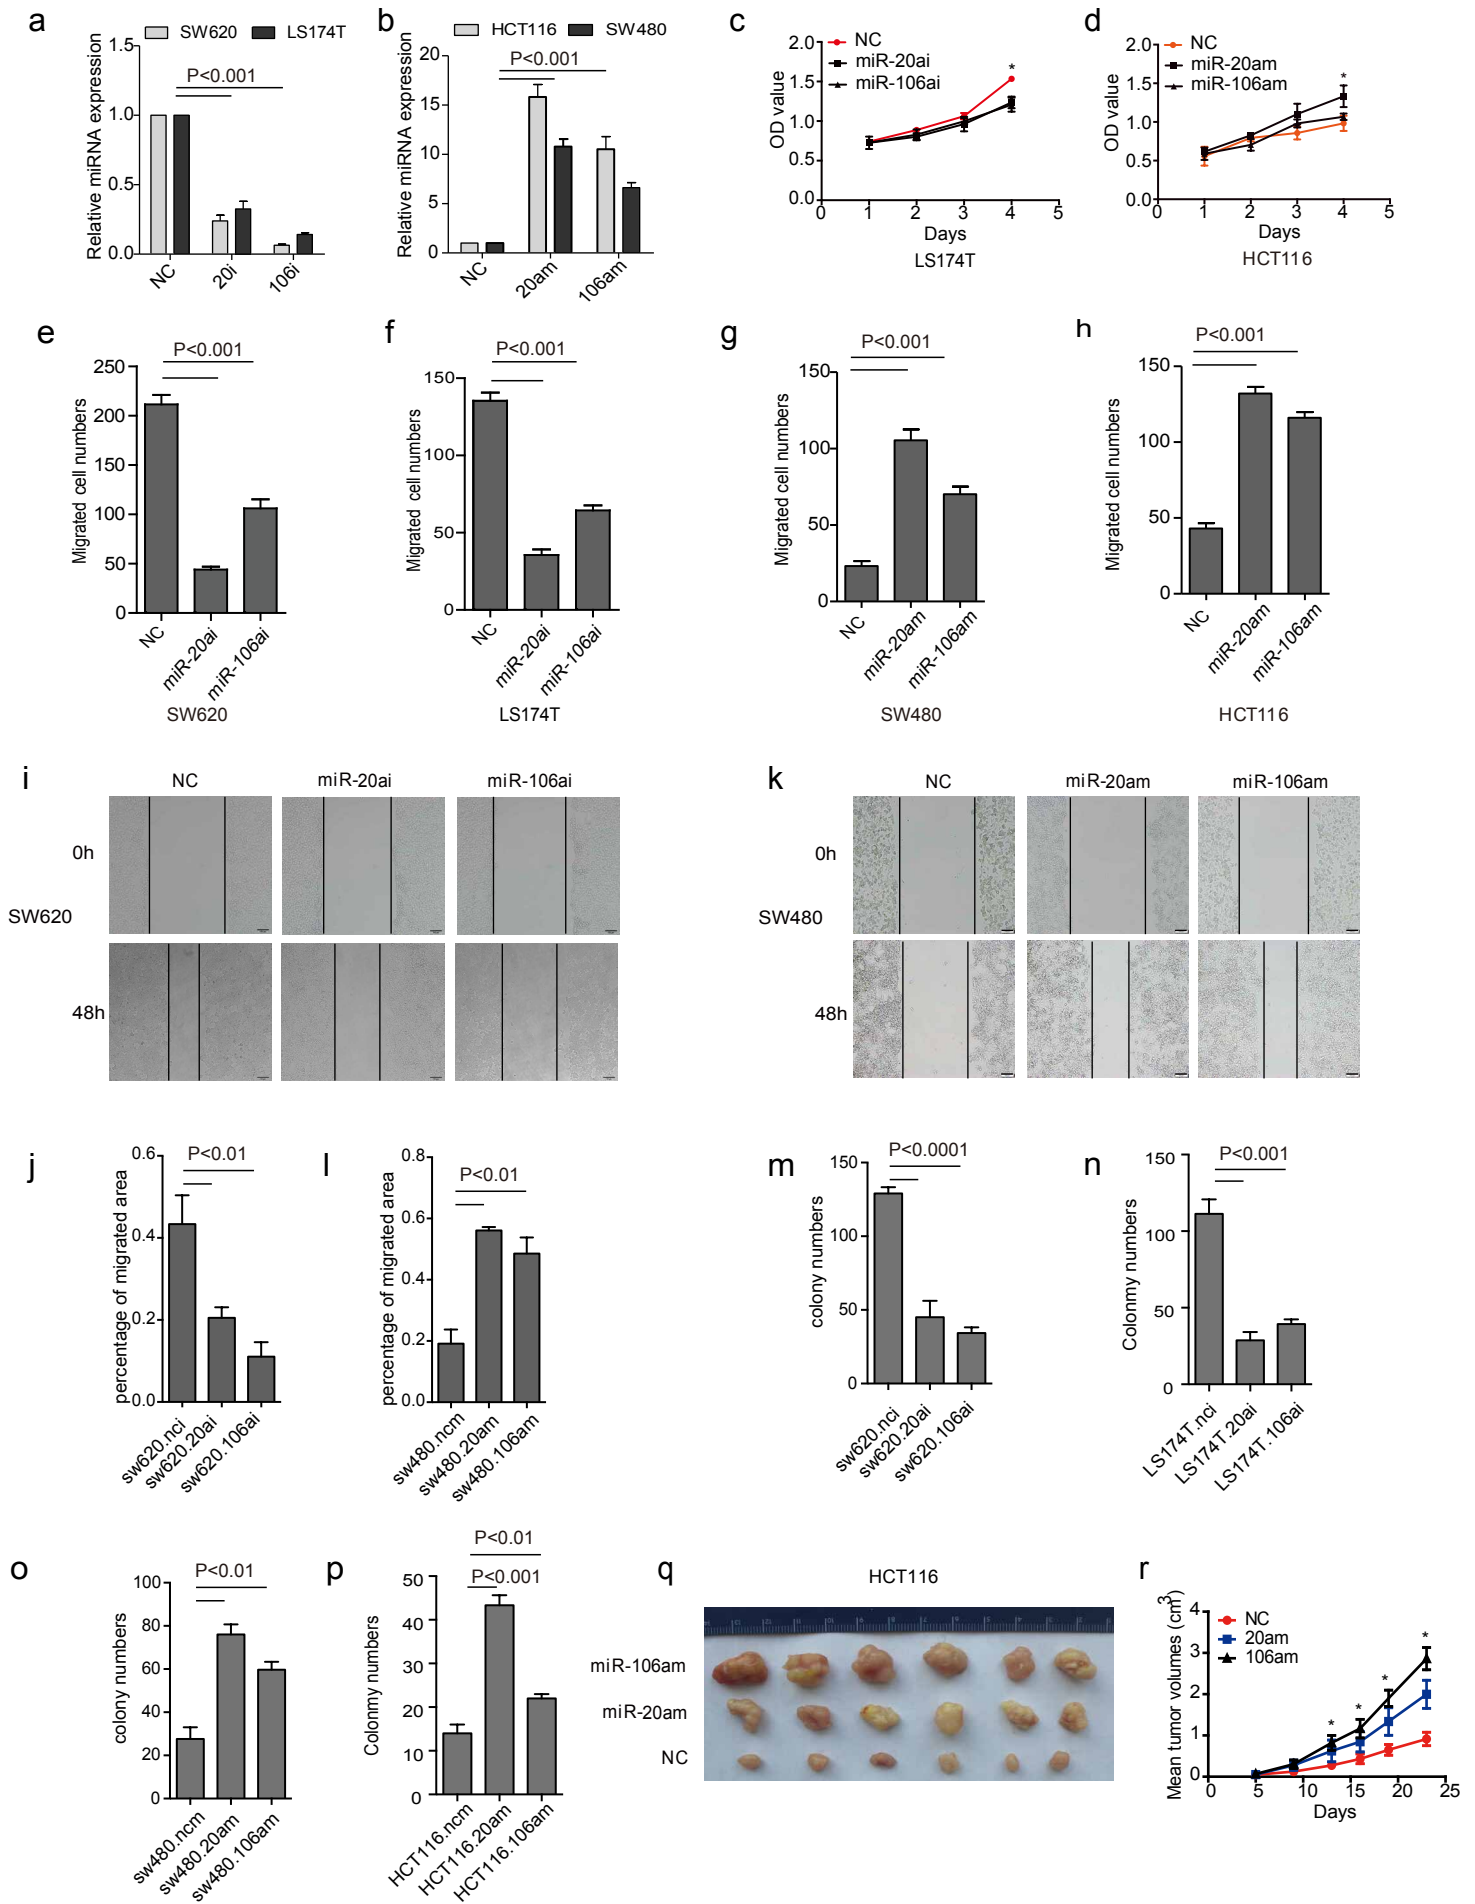

**Supplementary Figure 6. MiR-20a/106a inhibits WTX expression and promotes CRC cell proliferation and migration.**

**a-b**, The qRT-PCR analyzes miRNA-20a/106a expression in the indicated cells.  $***p < 0.001$ . **c-d**, CCK8 assays analyze cell proliferation in the indicated cells.  $*p < 0.05$ . **e-h**, Quantifications of cell migration of the indicated cell lines.  $***p < 0.001$ . **i-l**, Wound healing assays and quantifications analyze the cell migrations of the indicated cells.  $**p < 0.01$ . **m-p**, Quantifications analyze the colony formations of the indicated cell lines.  $***p < 0.001$ ,  $**p < 0.01$ . **q**, Gross observation of the subcutaneous xenograft tumor models of the indicated cell lines. **r**, Growth curves of the subcutaneous xenograft tumor models of the control and miR-20a/106a overexpression HCT116 cells.  $*p < 0.05$ , mean  $\pm$  SEM, n=6 mice. Two-tailed Student's t-test. 3 biological replicates, with 3 technical replicates for the in vitro experiments.



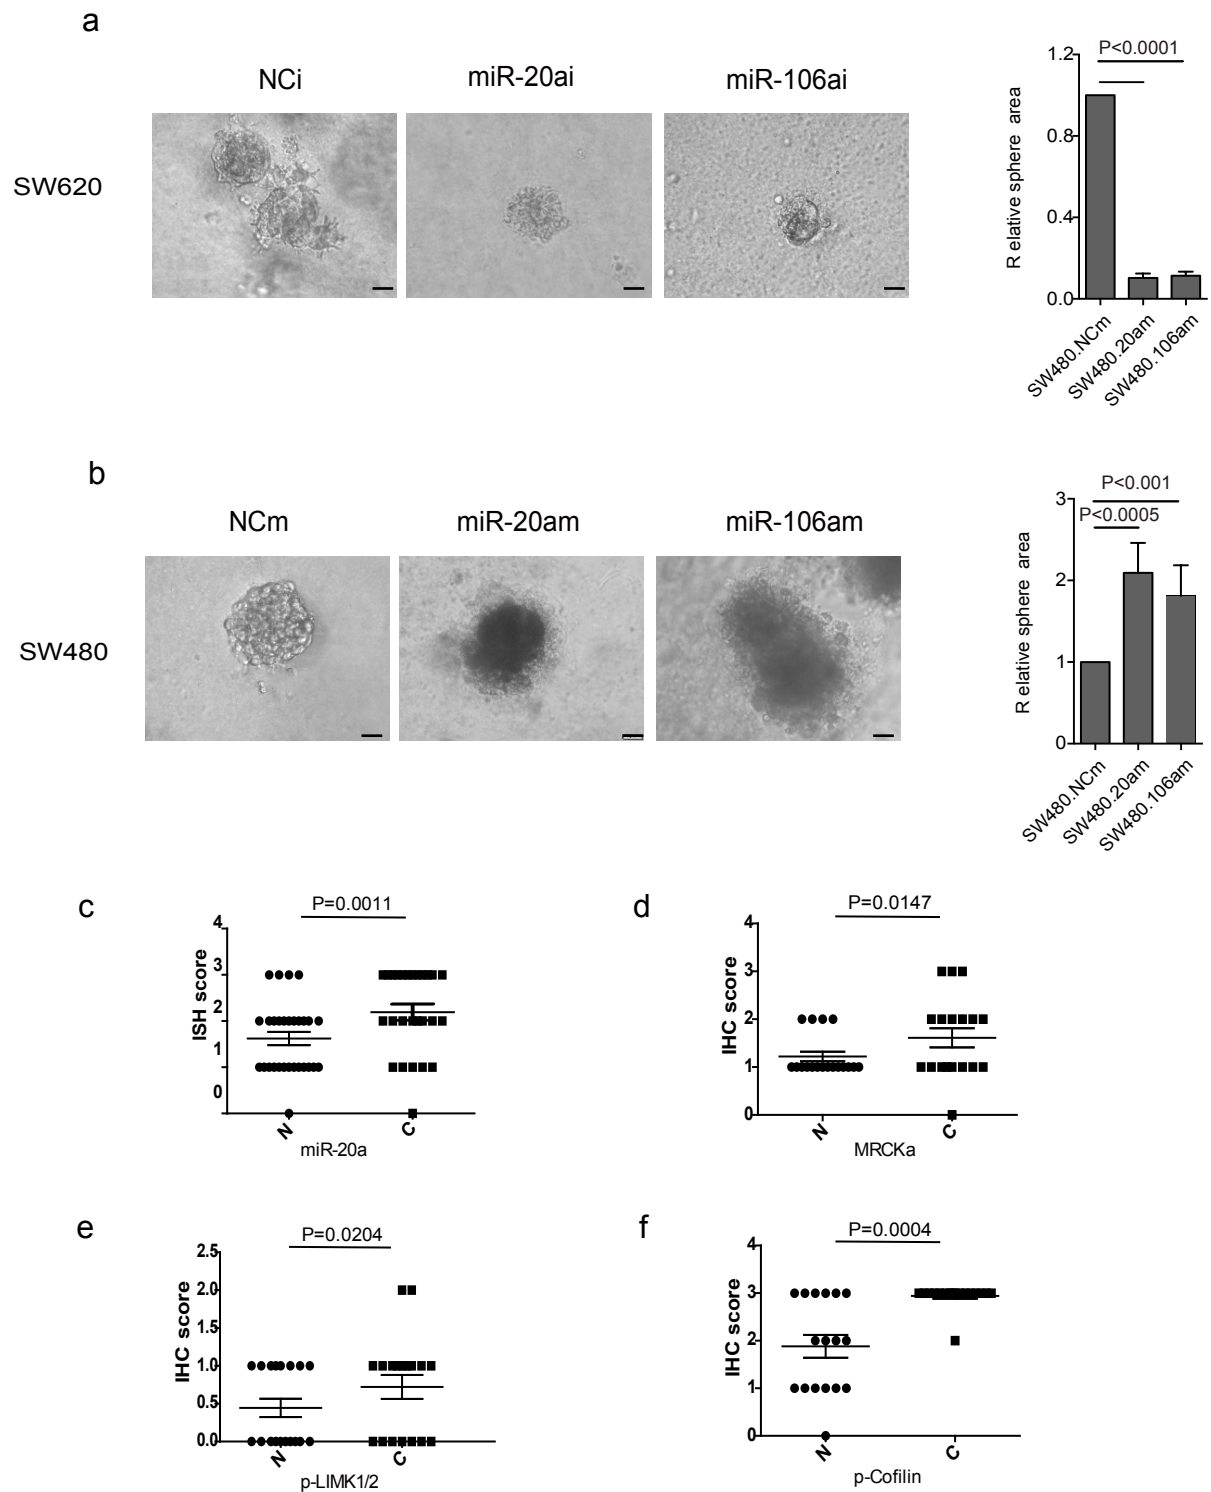

**Supplementary Figure 7. 3D culture and statistical analysis to verify the function and mechanism of miRNAs.**

**a-b**, 3D culture analyze the invasion ability changings of miR-20ai/106ai(**a**), miR-20am/106am (**b**) CRC cell lines. **c-f**, Statistic analysis of ISH and IHC staining score of miR-20a(**c**), MRCKa(**d**), p-LIMK1/2(**e**), and p-Cofilin expression(**f**). \*\*\* $p < 0.001$ , \*\* $p < 0.01$ , mean $\pm$ SEM, Two-tailed Student's t-test, 3 biological replicates, with 3 technical replicates each.

**WB#1**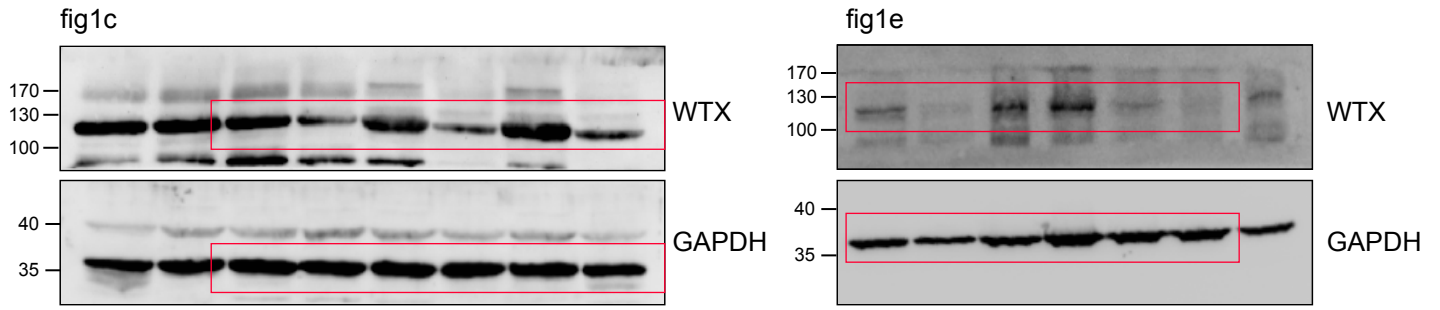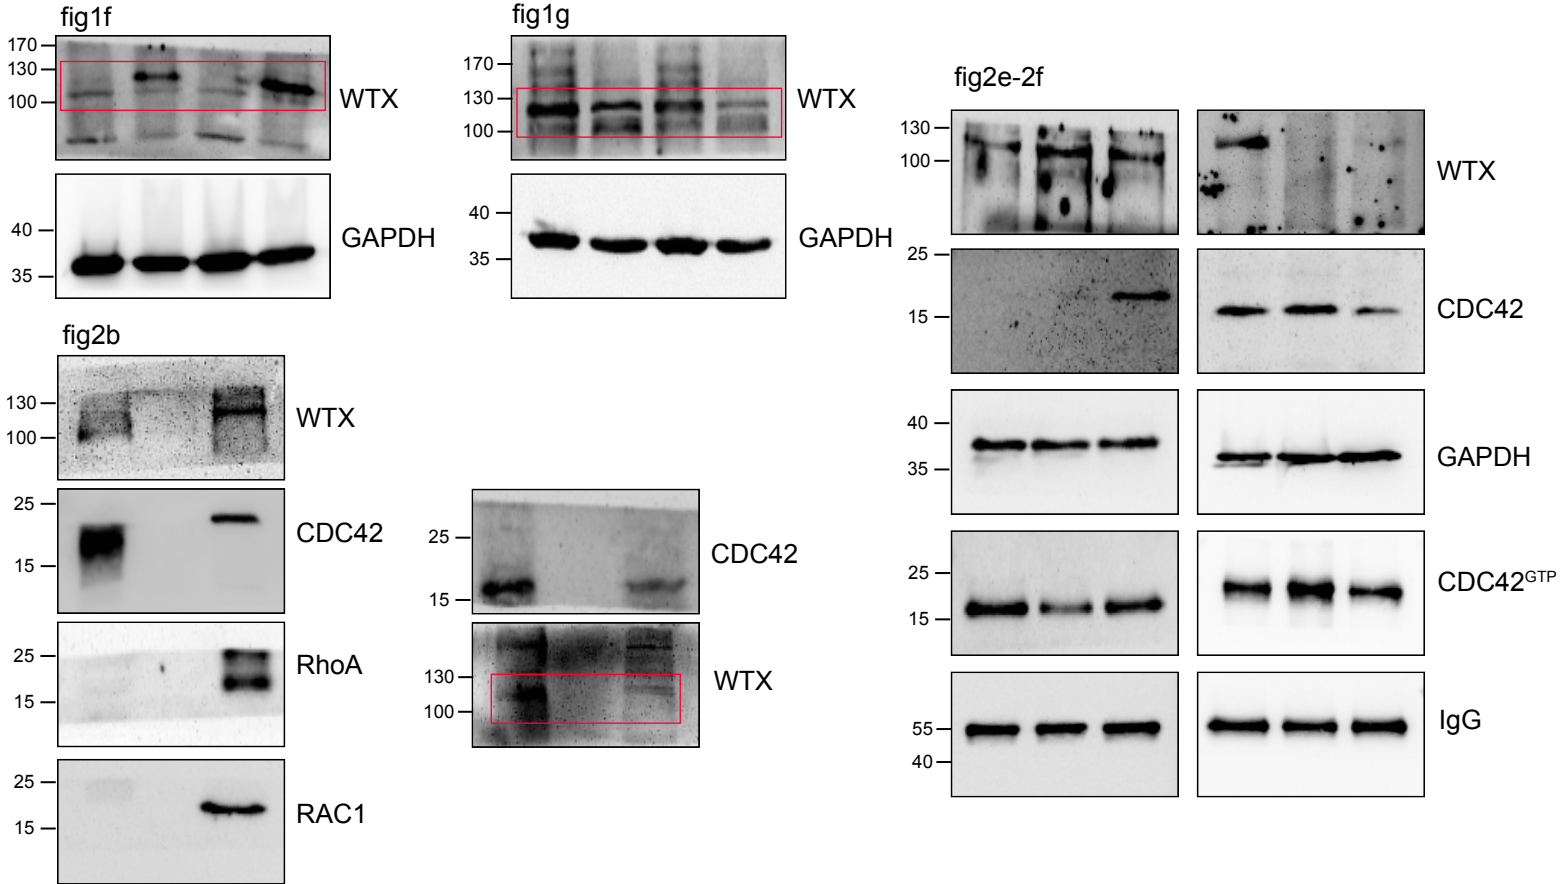

**WB#2**

**fig3b**

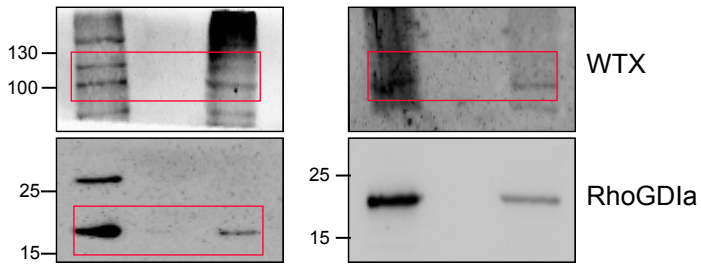

**fig3c**

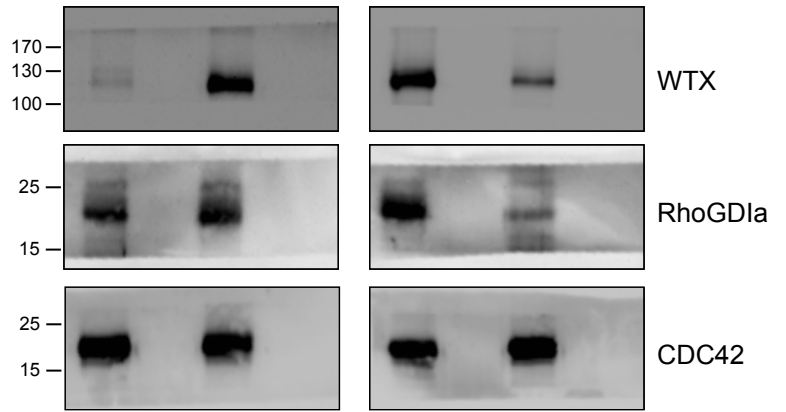

**fig3d**

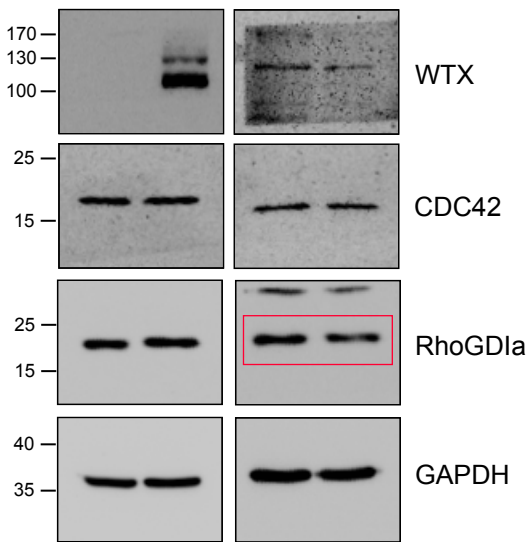

**fig3e**

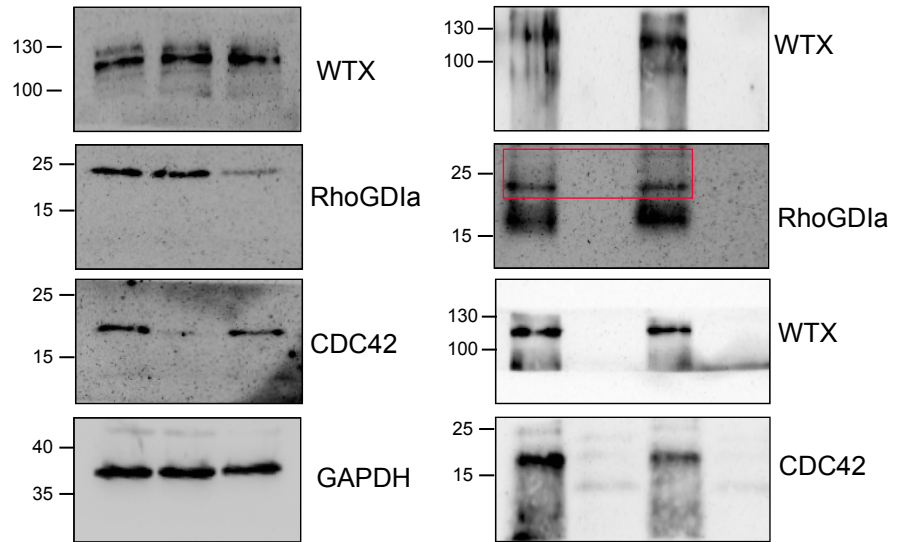

**fig3f**

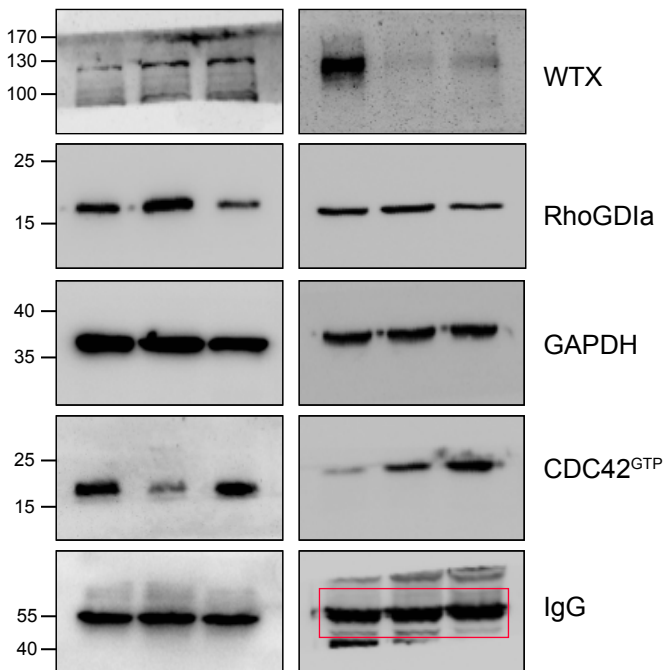

**fig4d**

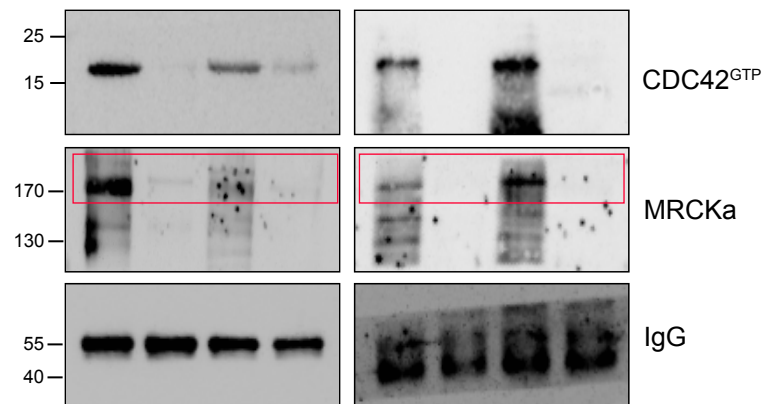

WB#3

fig4e

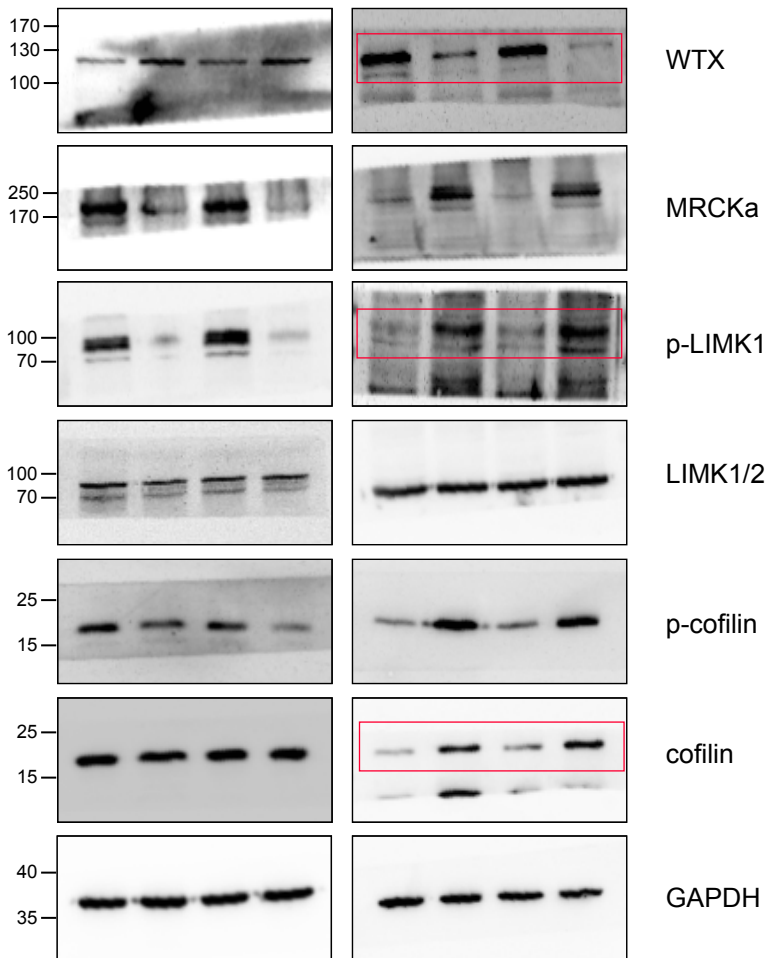

fig6c

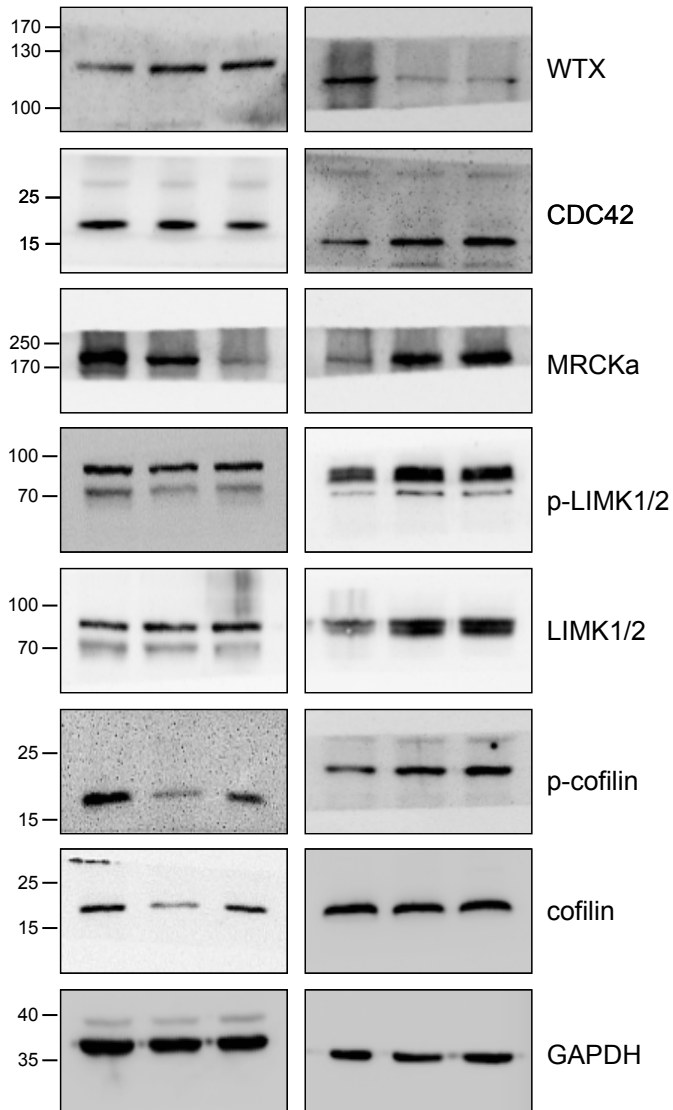

fig5d

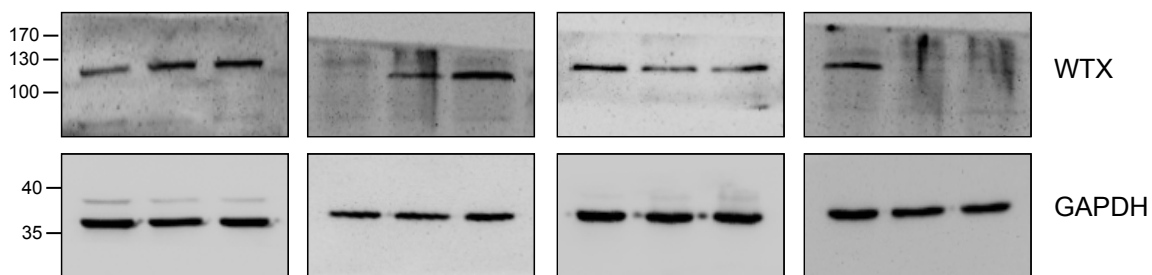

fig6a

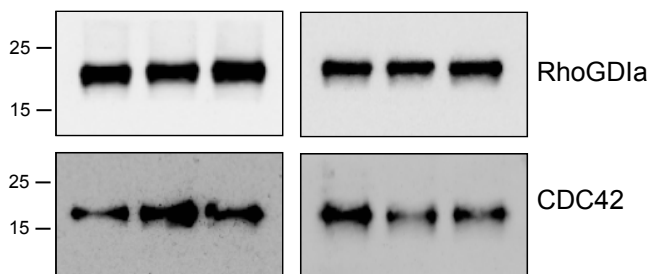

fig6b

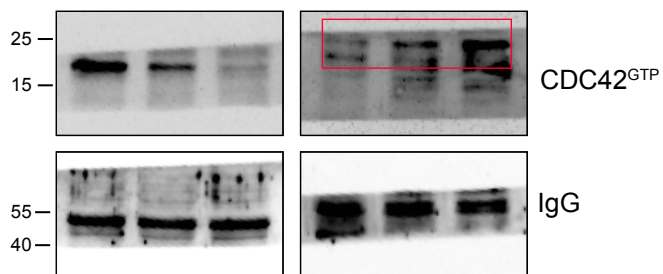

**WB#4**

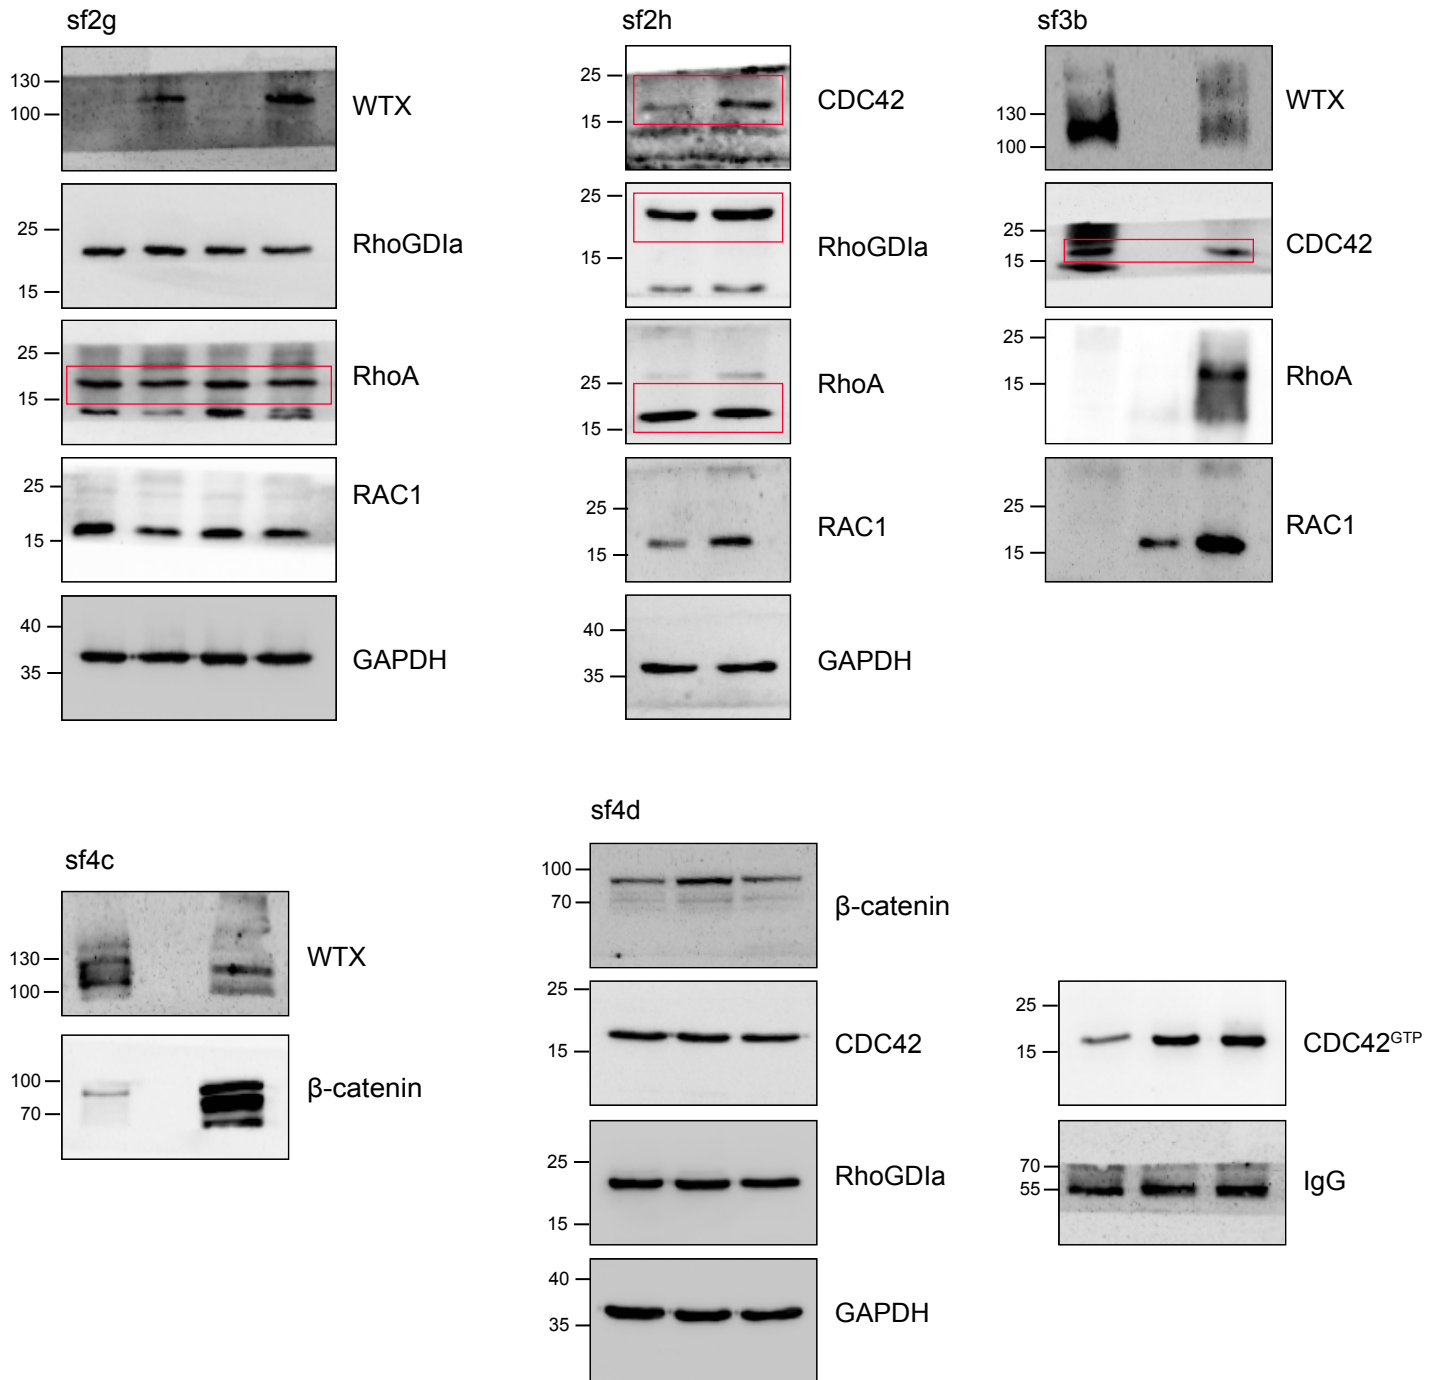



## Supplementary Table Legends

Supplementary Table 1: WTX gene modified orthotopic xenograph CRC tumor models formation and liver metastasis analysis.

|           | Total mice number | Orthotropic tumor<br>N(%) | High tumor burden<br>N(%) | Liver metastasis<br>N(%) |
|-----------|-------------------|---------------------------|---------------------------|--------------------------|
| SW620.veh | 11                | 11(100)                   | 7(63.6)                   | 7(63.6)                  |
| SW620.W   | 11                | 5(45.5)                   | 0(0)                      | 0(0)                     |
| SW480.scr | 8                 | 5(62.5)                   | 0(0)                      | 0(0)                     |
| SW480.shW | 8                 | 8(100)                    | 8(100)                    | 6(75)                    |

High tumor burden: The tumor mass is more than 1cm in diameter.

## Supplementary Table 2 : The primers sequences for WTX gene CDS amplification.

|     |          |                                                |
|-----|----------|------------------------------------------------|
| WTX | Primer F | 5'-ATCCGGGAATTCGCCACCATGGAGACCCAAAAGGATGAAG-3' |
|     | Primer R | 5'-ATCATCGGATCCCCTTGGCTAGGTTTCCATTCATG-3'      |

## Supplementary Table 3: List of primers used in qRT-PCR.

| Primers   | Sequence                             |
|-----------|--------------------------------------|
| WTX       | F, 5'-GACCCAAAAGGATGAAGCT-3'         |
|           | R, 5'-CCCCTCCAAAGAACTAGGC-3'         |
| GAPDH     | F, 5'-TGAAGGTCGGAGTCAACGGA-3'        |
|           | R, 5'-CCATTGATGACAAGCTTCCCG-3'       |
| WTX 3'UTR | F, 5'-CATCTAGA AACACCACCACTCAAGGG-3' |

|  |                                         |
|--|-----------------------------------------|
|  | R, 5'-TAAAGGCCGGCCAAGGCTGTCCAAACCATG-3' |
|--|-----------------------------------------|

**Supplementary Table 4: List of shRNAs coding sequences**

| shRNAs  | Coding sequence           |
|---------|---------------------------|
| shWTX   | TGCCCTATATGAGTTCTAT       |
| shCDC42 | AAAGACUCCUUUCUUGCUUGUdTdT |

Supplementary Table 5: miR-20a and miR-106a binding sites on WTX gene predicating.

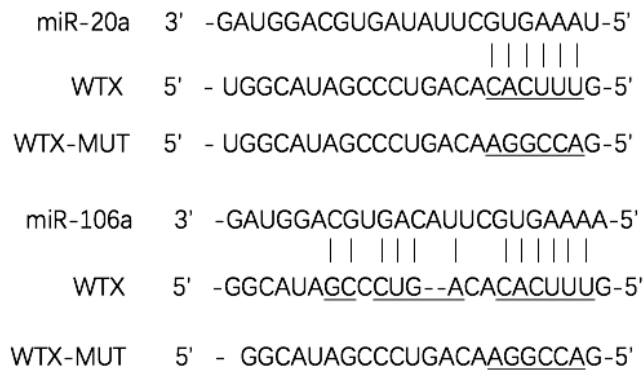

**Supplementary Table 6: MiR-20a/106a modified orthotopic xenograph CRC tumor formation and liver metastasis analysis.**

|                 | Total mice number | Orthotopic tumor N(%) | High tumor burden N(%) | Liver metastasis N(%) |
|-----------------|-------------------|-----------------------|------------------------|-----------------------|
| SW620.NCi       | 6                 | 6(100)                | 6(100)                 | 4(66.7)               |
| SW620-20ai      | 6                 | 0(0)                  | 0(0)                   | 0(0)                  |
| SW620-106ai     | 6                 | 0(0)                  | 0(0)                   | 0(0)                  |
| SW480.scr       | 5                 | 4(80)                 | 3(60)                  | 1(20)                 |
| SW480.shW       | 5                 | 5(100)                | 5(100)                 | 4(80)                 |
| SW480.shW.shCDC | 5                 | 0(0)                  | 0(0)                   | 0(0)                  |

High tumor burden: The tumor mass is more than 1cm in diameter

**Supplementary Table 7: List of antibodies used in IHC, IF and western blot experiments:**

| Antigen              | Catalog number | Source                    | Application          |
|----------------------|----------------|---------------------------|----------------------|
| WTX                  | 5854s          | Cell signaling technology | WB                   |
| WTX                  | MAB7374        | R&D systems               | WB                   |
| RhoA                 | 12441-H07B     | Sino Biological Inc.      | WB, ELISA, IP        |
| RAC1                 | sc-95          | Santa Cruz Biotechnology  | WB, ELISA, IP, IHC-P |
| CDC42                | A1188          | Abclonal                  | WB, IHC              |
| CDC42 <sup>GTP</sup> | 26905          | BIO-NEWEAST               | IP,                  |
| RhoGDI $\alpha$      | 2977-1         | Eptiomics                 | WB,IHC,ICC           |
| MRCK $\alpha$        | WH0008476M1    | Sigma                     | WB、 IP、 IHC-P、 IF    |
| P-LIMK1/2(T508/505)  | ab131341       | Abcam                     | WB, IHC-p,ICC/IF     |
| LIMK1/2              | ab39641        | Abcam                     | ICC/IF, WB, ELISA    |
| Cofilin              | ab42824        | Abcam                     | ICC/IF, WB, IHC-P    |
| p-Cofilin(Ser3)      | 3313s          | Cell signaling technology | WB, IF               |
| Ki-67                | 9449           | Cell signaling technology | IHC,IF,F             |
| RhoGD1 $\alpha$      | ab133248       | Eptiomics                 | WB, IHC-P, ICC       |
| Flag                 | 66008-2-Ig     | ProteinTech               | ELISA, WB, IP, IF    |
| $\beta$ -actin       | PR-0255        | ZSGB-BIO                  | WB, ICC/IF, IHC, IP  |
| GAPDH                | TA336621       | ZSGB-BIO                  | WB, ICC/IF, IHC, IP  |
